# Supplementary material for: POSS-enhanced thermosensitive hybrid hydrogels for cell adhesion and detachment
Source: Royal Society of Chemistry journal article supplement (doi:10.1039/c8ra01584h), 2018-01-01
Supplement: c8ra01584h1.pdf [file c8ra01584h1.pdf]

## Supplementary material

### POSS-enhanced thermosensitive hybrid hydrogels for cell adhesion and detachment

Yudong Tong,<sup>a</sup> Yuanhao Zhang,<sup>b</sup> Yangyang Liu,<sup>a</sup> Haibo Cai,<sup>\*a</sup> Weian Zhang<sup>\*b</sup> and Wen-Song Tan<sup>a</sup>

<sup>a</sup>State Key Laboratory of Bioreactor Engineering, East China University of Science and Technology,  
130 Meilong Road, Shanghai 200237, P. R. China.

<sup>b</sup>Shanghai Key Laboratory of Functional Materials Chemistry, East China University of Science and  
Technology, 130 Meilong Road, Shanghai 200237, P. R. China.

\*Corresponding authors. Tel.: +862164253033; Fax: +862164253033.

Email: [caihaibo@ecust.edu.cn](mailto:caihaibo@ecust.edu.cn) (H. Cai) ; [wazhang@ecust.edu.cn](mailto:wazhang@ecust.edu.cn) (W. Zhang)

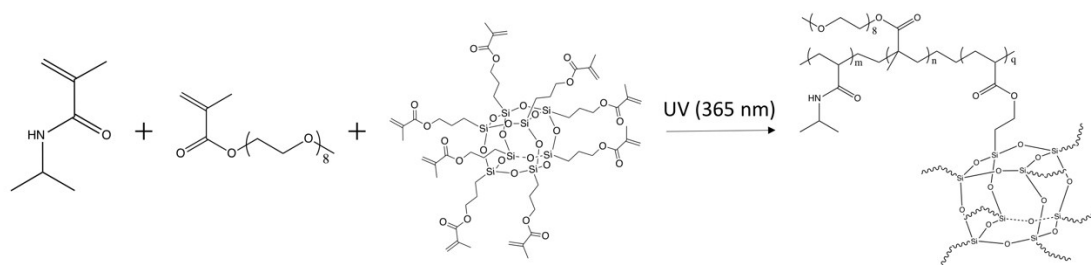

Fig. S1 Synthesis of the POSS-PNIPAM hydrogel.

Table S1. The feed ratio of NIPAM, OEGMA, OMAPOSS, MBA, photo-initiator (Irgacure 2959) and solvent.

| Code               | P10N | P20N | P30N | MN   |
|--------------------|------|------|------|------|
| NIPAM (mg)         | 135  | 135  | 135  | 135  |
| OEGMA (mg)         | 18   | 18   | 18   | 18   |
| Irgacure 2959 (mg) | 4    | 4    | 4    | 4    |
| OMAPOSS (mg)       | 10   | 20   | 30   | N/A  |
| MBA (mg)           | N/A  | N/A  | N/A  | 12.9 |
| 1, 4-dioxane (mL)  | 1    | 1    | 1    | 1    |

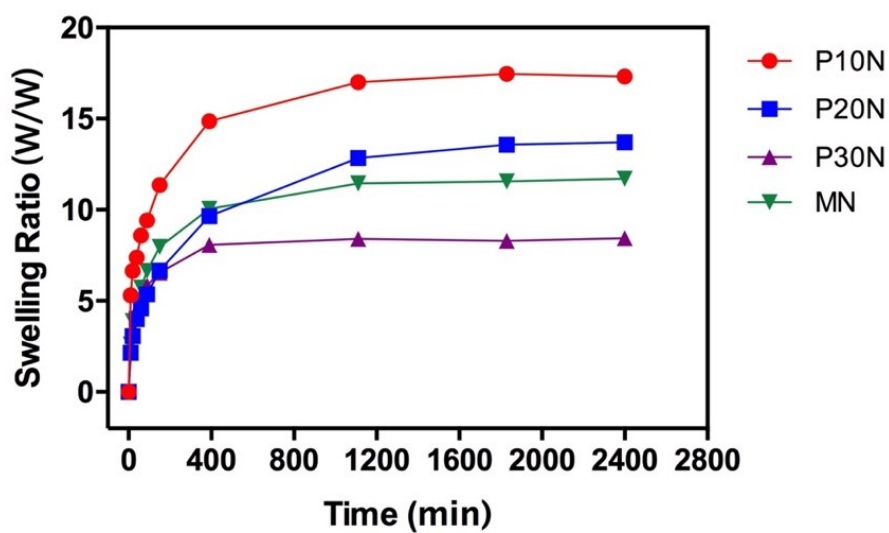

Fig. S2 Swelling kinetics of PNIPAM based hydrogels (4 °C).

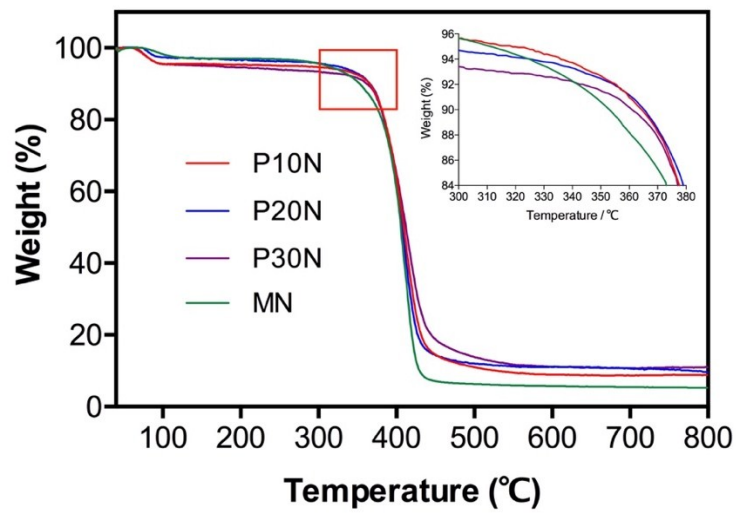

Fig. S3 TGA curves of POSS-PNIPAM and MBA-PNIPAM (MN) hydrogels.

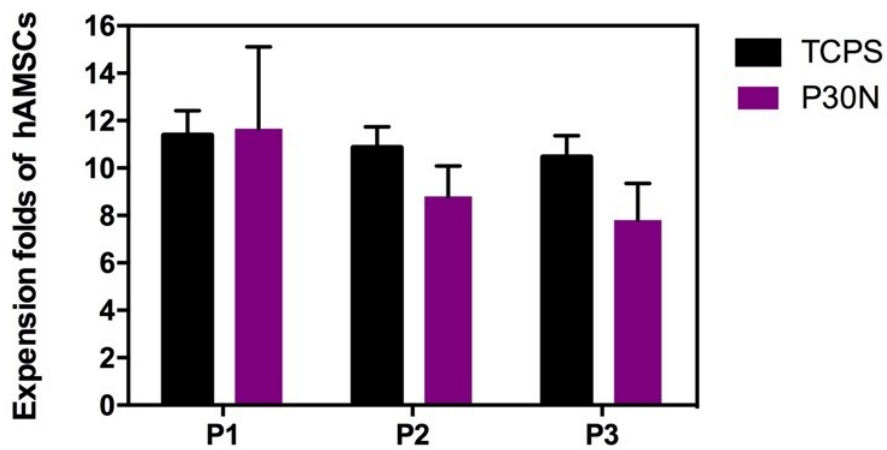

Fig. S4 Re-proliferation of hAMSCs on TCPS and the P30N hydrogel. Results were mean  $\pm$  SD, n = 3.
